# Supplementary material for: Humoral and Cellular Responses to COVID-19 Vaccines in SARS-CoV-2 Infection-Naïve and -Recovered Korean Individuals
Source: MDPI journal article supplement (doi:10.3390/vaccines10020332), 2022-02-18
Supplement: s1 [file s1]

**Table S1.** Anti-SARS-CoV-2 nucleocapsid antibody titers in SARS-CoV-2-naïve individuals.

| Vaccines         | SARS-CoV-2 NCP IgG ELISA<br>(Ratio) |           |
|------------------|-------------------------------------|-----------|
|                  | Pre                                 | Post      |
| Ad26.COVS.2.S    | 0.07±0.02                           | 0.08±0.04 |
| ChAdOx1          | 0.09±0.05                           | 0.10±0.08 |
| ChAdOx1/BNT162b2 | 0.11±0.13                           | 0.17±0.25 |
| BNT162b2         | 0.10±0.07                           | 0.12±0.07 |
| mRNA-1273        | 0.17±0.14                           | 0.22±0.26 |

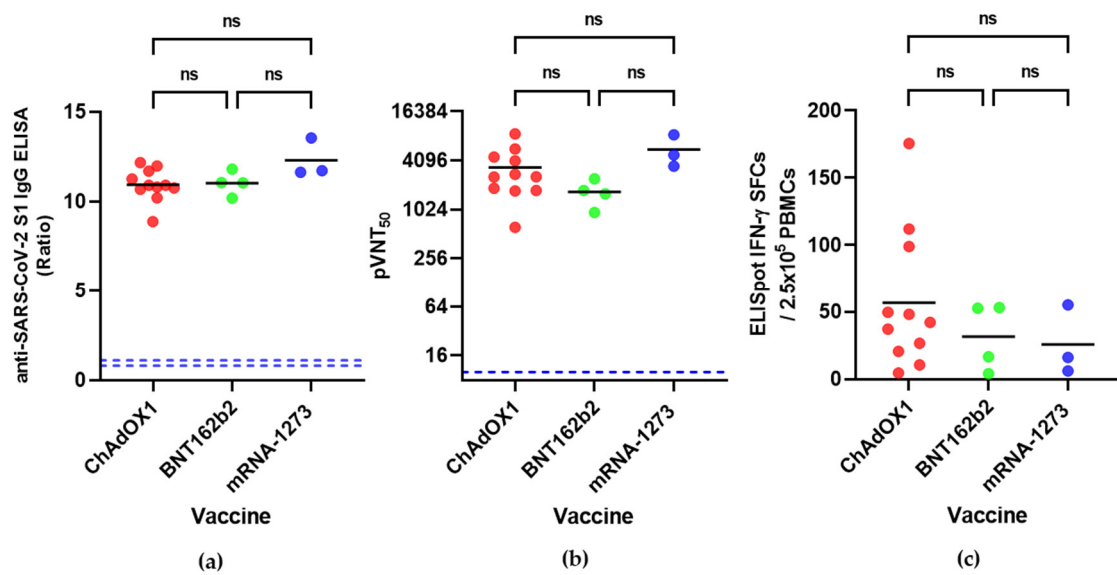

**Figure S1.** Comparison of humoral and cellular immune responses induced by three kinds of COVID-19 vaccines in SARS-CoV-2-recovered individuals vaccinated with a single dose. (a) SARS-CoV-2 S1 IgG ELISA ratio; (b) pVNT<sub>50</sub> titer; (c) IFN-γ ELISpot counts. The blue dashed line indicates the cutoff (S1-IgG=0.8 for positive and 1.1 for negative, pVNT<sub>50</sub> =10). Significance was tested using one-way ANOVA with Tukey's multiple comparisons or Kruskal-Wallis test by Dunn's multiple comparisons test (ns,  $p > 0.05$ ).

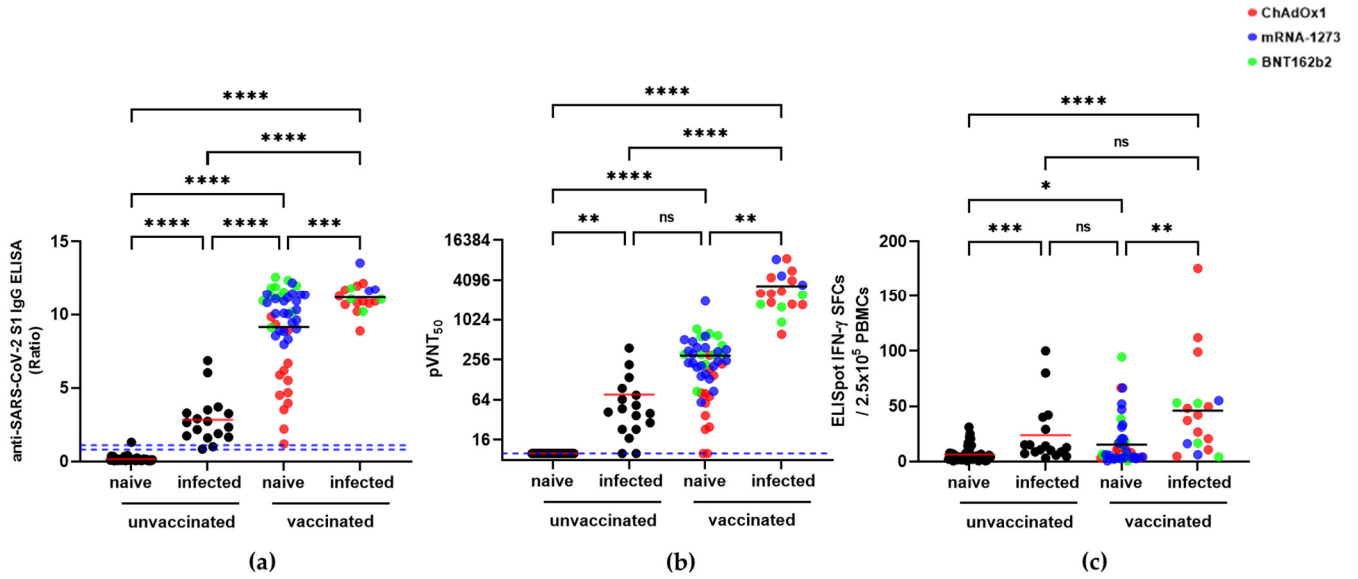

**Figure S2** Comparison of humoral and cellular immune responses in SARS-CoV-2-naïve and -recovered individuals (unvaccinated and vaccinated with either ChAdOX1, BNT162b2, or mRNA-1273 COVID-19 vaccines). (a) SARS-CoV-2 S1 IgG ELISA ratio; (b) pVNT<sub>50</sub> titer; (c) IFN-γ ELISpot counts. The blue dashed line indicates the cutoff (S1-IgG=0.8 for negative and 1.1 for positive, pVNT<sub>50</sub> =10). Significance was tested using one-way ANOVA with Tukey's multiple comparisons test or Kruskal–Wallis test by Dunn's multiple comparisons test. ns,  $p > 0.05$ , \* $p < 0.05$ , \*\* $p < 0.01$ , \*\*\* $p < 0.001$ , \*\*\*\* $p < 0.0001$

**Table S2.** Mean values of humoral and cellular immune responses of SARS-CoV-2 naïve and recovered individuals (unvaccinated and vaccinated with either ChAdOX1, BNT162b2, or mRNA-1273 COVID-19 vaccines).

| SARS-CoV-2 | SARS-CoV-2 IgG ELISA<br>(Ratio) |            | pVNT<br>(pVNT <sub>50</sub> ) |             | IFN-γ ELISpot<br>(SFCs/2.5x10 <sup>5</sup> cells) |            |
|------------|---------------------------------|------------|-------------------------------|-------------|---------------------------------------------------|------------|
|            | Unvaccinated                    | Vaccinated | Unvaccinated                  | Vaccinated  | Unvaccinated                                      | Vaccinated |
| Naïve      | 0.2±0.2                         | 9.2±2.9    | 10                            | 294±310     | 6.3±7.1                                           | 15.3±20.4  |
| Infected   | 2.8±1.6                         | 11.2±1.0   | 77±95                         | 3,333±2,322 | 23.8±27.6                                         | 46.0±44.3  |
